# Supplementary material for: A Herpesviral Immediate Early Protein Promotes Transcription Elongation of Viral Transcripts
Source: PubMed Central journal article supplement (PMC5472187; doi:10.1128/mbio.00745-17), 2017-06-13
Supplement: mbo003173347st1.pdf [file mbo003173347st1.pdf]

| Virus  | Genes Mutated (ICP)      | SSRP1 Relocalization |
|--------|--------------------------|----------------------|
| d109   | 4, 27, <b>22</b> , 47, 0 | NO                   |
| d106   | 4, 27, <b>22</b> , 47    | NO                   |
| d95    | 4, 27, <b>22</b>         | NO                   |
| d92    | 4, 27                    | YES                  |
| d96    | 4, <b>22</b>             | NO                   |
| DMP    | 27, <b>22</b>            | NO                   |
| d120   | 4                        | YES                  |
| 5dl1.2 | 27                       | YES                  |
| d99    | 0                        | YES                  |
| n199   | <b>22</b>                | NO                   |

**Table S1. Analysis of SSRP1 localization in IE Mutants.** Vero cells were infected with viruses defective in one or more HSV-1 immediate early protein. Infected cells were fixed and stained 3 hours post infection. Images were analyzed to determine whether SSRP1 reorganized into puncta (YES) or remained mostly in the nucleolus (NO). Virus references are included in Materials and Methods.
